# Supplementary material for: Isolation, growth, and nitrogen fixation rates of the Hemiaulus-Richelia (diatom-cyanobacterium) symbiosis in culture
Source: PeerJ. 2020 Oct 8;8:e10115. doi: 10.7717/peerj.10115 (PMC7548074; doi:10.7717/peerj.10115)
Supplement: Supplemental Information 1 [file peerj-08-10115-s001.xls]

## Sheet: Sheet1
Strain Information
Species	Strains	Isolated	Figure used in	Experimental medium
H. hauckii	9	Spring 2010	3	no added N, modified YBCII
H. hauckii	22	Fall 2010	4a	no added N, modified YBCII
H. hauckii	83	Fall 2011	6	N-source experiment, multiple media, see text
H. hauckii	91	Fall 2011	2, 3, 5	no added N, modified YBCII
H. hauckii	92	Fall 2011	4a	no added N, modified YBCII
H. membranaceus	82	Fall 2011	4b	no added N, modified YBCII
Figure 2 growth curve data
HL= 200 µmol quanta m-2 s-1			%symbiotic=% of host cells cotaining symbionts
LL= 50 µmol quanta m-2 s-1			Strain #91
SD= standard deviation
Day	HL µg chl L-1	mean chl SD	HL cells ml-1	cells SD	HL pg chl cell\+-1	HL % symbiotic			Day		LL µg chl L-1	mean chl SD	LL cells ml-1	LL cells SD	LL pg chl cell\+-1	LL % symbiotic
1			68.5	6.36396		95			1				64	5.65685		96.5
2	0.3425	0.378302	128.5	16.2635	2.66537	91.5			2		0.2425	0.0954594	67	4.24264	3.6194	96.5
3	1.1438	0.266933	234	9.89949	4.88803	93			3		0.33625	0.0477297	78	4.24264	4.3109	96
4	1.555	0.0883883	317.5	24.7487	4.89764	92.5			4		0.385	0.16617	99.5	14.8492	3.86935	96.5
5	2.27	0.311127	625.5	34.6482	3.6291	93.5			5		0.6175	0.0424264	223	11.3137	2.76906	95
6	3.0325	0.611647	962.5	17.6777	3.15065	92.5			6		0.87125	0.129047	411	41.0122	2.11983	97
7	4.3613	0.00176777	1480.5	84.1457	2.94583	94.5			7		1.04875	0.510885	467.5	17.6777	2.24332	95.5
8	3.8825	0.873277	1635	148.492	2.37462	93.5			8		1.4225	0.183848	520.5	41.7193	2.73295	95
9	7.3775	1.43543	2800	6.36396	2.63482	94.5			9		1.73625	0.0548008	650.5	14.8492	2.6691	95.5
10	10.6563	0.832618	4750	268.701	2.24343	97.5			10		2.35625	0.312895	1627.5	67.1751	1.44777	96
11	15.6163	2.1938	5410.5	126.572	2.8863	97.5			11		2.5525	0.491439	1765	106.066	1.44618	95.5
12	13.185	1.03238	6955	403.051	1.89576	96.5			12		3.5175	0.0707107	1903.5	23.3345	1.84791	95.5
13	12.8963	0.0123744	6015.5	557.907	2.14385	94			13		3.74125	0.15026	2465	360.624	1.51775	95.5
14	14.625	0.869741	4985	360.624	2.9338	93.5			14		3.64875	1.82964	3530	155.563	1.03364	96.5
15									15		5.37125	0.358857	6290	169.706	0.853935	94.5
16									16		6.625	0.0353553	6640	410.122	0.997741	95
Figure 3 data
Symbiont and Host growth rate data			K= div per day
	Strain # 92				Strain # 91		Strain #9
	Run 1				Run 2		Preliminary run
Irradiance	Symbiont K	95% Ci	Host K	95% Ci	Host K	95% Ci
30	0.13	0.03	0.15	0.03	0.19	0.02
50	0.23	0.03	0.24	0.03	0.37	0.0444	0.5	0.07
75	0.45	0.03	0.46	0.03	0.52	0.0416
150	0.67	0.07	0.67	0.07	0.82	0.123
158							0.61	0.1
200	0.76	0.05	0.76	0.06	0.85	0.0425
350	0.74	0.07	0.74	0.07	0.87	0.0696
500	0.73	0.06	0.72	0.06	0.99	0.1972
Figure 4	rates in fmol N2 heterocyst-1 hr-1				Red outlines illustrate the 5 pt averaging used . It included the time point and two samplings before and after the time point.
					Vials were individual sampled over the duration of the experiment. Vial Hk 2a is highlighted in red to show the sampling over ~18 hours
					Begin Time	is the start time for the vial time series. For example, vial Hk2a was initially sampled at 5:34 a.m., then at 6:32, 7:32, 8:31, etc.
H. hauckii DDA	Strain 22	run Mar. 2010	strain #92	run 15 July 2011							H. membranaceus DDA	Strain #82	run 30 July 2011
Time	4 h incubation rate	std dev	Time	Vial	Begin Time for vial time series	individual rate	5 pt running average	std dev			Time	Vial	Begin Time for vial time series	individual points	5 pt running average	stdev
1899-12-31 08:20:00	11.8021	1.99306
1899-12-31 09:50:00	13.6005	1.23135	1899-12-31 01:27:00	HK1a	1899-12-31 01:27:00	3.47077	4.8	0.2658			1899-12-31 01:03:00	HM1a	1899-12-31 01:03:00	0.9012	0.55638	0.375116
1899-12-31 12:08:00	17.9711	2.74265	1899-12-31 02:06:00	HK1b	1899-12-31 02:06:00	10.3643	3.882	0.3918			1899-12-31 01:15:00	HM1b	1899-12-31 01:15:00	0.6114	0.975612	0.892626
1899-12-31 14:04:00	26.4769	3.82075	1899-12-31 02:54:00	HK1a		0.559136	3.708	0.744			1899-12-31 07:31:00	HM1a		0.1569	0.55638	0.375116
1899-12-31 16:00:00	21.2036	1.33297	1899-12-31 04:00:00	HK1b		1.13194	2.694	0.78			1899-12-31 07:38:00	HM1b		2.2332	4.38902	6.8355
1899-12-31 19:00:00	7.26	2.88495	1899-12-31 04:21:00	HK1a		3.02829	0.5298	0.762			1899-12-31 08:30:00	HM2a	1899-12-31 08:30:00	14.556	7.9821	6.85848
			1899-12-31 04:58:00	HK1b		-1.6046	0.2844	0.5166			1899-12-31 08:36:00	HM2b	1899-12-31 08:36:00	15.102	9.0882	5.61408
			1899-12-31 05:25:00	HK1a		-0.466526	-0.0804	0.1656			1899-12-31 08:41:00	HM1a		7.866	16.3559	13.0794
			1899-12-31 05:34:00	HK 2a	1899-12-31 05:34:00	-0.667422	0.09	0.2994			1899-12-31 08:47:00	HM1b		5.6874	22.9235	18.8987
			1899-12-31 05:39:00	HK 2b	1899-12-31 05:39:00	-0.69084	0.846	0.3756			1899-12-31 09:31:00	HM2a		38.574	21.9143	19.5446
			1899-12-31 06:06:00	HK1b		3.87949	1.536	0.3336			1899-12-31 09:36:00	HM2b		47.394	24.2851	18.0785
			1899-12-31 06:24:00	HK1a		2.16658	1.758	0.3414			1899-12-31 09:42:00	HM3a	1899-12-31 09:42:00	10.056	25.0676	17.1321
			1899-12-31 06:32:00	HK 2a		2.9834	1.812	0.2496			1899-12-31 09:48:00	HM3b	1899-12-31 09:48:00	19.722	20.1603	15.7556
			1899-12-31 06:38:00	HK 2b		0.446111	2.928	0.2268			1899-12-31 09:54:00	HM1a		9.6	18.3052	11.7962
			1899-12-31 06:55:00	HK1b		-0.415772	2.202	0.252			1899-12-31 10:01:00	HM1b		14.034	26.3273	17.1885
			1899-12-31 07:21:00	HK1a		9.46488	1.788	0.5328			1899-12-31 10:33:00	HM2a		38.118	33.7777	21.211
			1899-12-31 07:32:00	HK 2a		-1.46206	2.874	0.5538			1899-12-31 10:38:00	HM2b		50.166	39.0823	16.4306
			1899-12-31 07:40:00	HK 2b		0.91836	4.848	0.696			1899-12-31 10:44:00	HM3a		56.97	40.0213	14.6824
			1899-12-31 07:55:00	HK1b		5.86174	3.666	1.086			1899-12-31 10:49:00	HM3b		36.12	36.398	17.2762
			1899-12-31 08:20:00	HK1a		9.44364	5.652	0.948			1899-12-31 10:56:00	HM4a	1899-12-31 10:56:00	18.732	27.8919	19.1698
			1899-12-31 08:31:00	HK 2a		3.57997	9.06	0.9			1899-12-31 11:02:00	HM4b	1899-12-31 11:02:00	19.998	17.4741	12.3602
			1899-12-31 08:40:00	HK 2b		8.4651	7.08	0.654			1899-12-31 11:08:00	HM4b		7.632	13.9558	7.11618
			1899-12-31 08:56:00	HK1b		17.8745	5.994	0.5772			1899-12-31 11:13:00	HM1a		4.8822	23.7905	25.5277
			1899-12-31 09:02:00	HK 3a	1899-12-31 09:02:00	-3.89492	8.16	1.086			1899-12-31 11:17:00	HM1b		18.528	30.8653	28.8944
			1899-12-31 09:10:00	HK 3b	1899-12-31 09:10:00	3.94284	8.82	3.324			1899-12-31 11:34:00	HM2a		67.92	39.1742	26.4106
			1899-12-31 09:30:00	HK 2a		14.5607	12.3	4.134			1899-12-31 11:40:00	HM2b		55.374	48.4846	18.2416
			1899-12-31 09:36:00	HK 2b		11.5006	24.36	4.032			1899-12-31 11:45:00	HM3a		49.182	52.0037	11.452
			1899-12-31 09:50:00	HK1a		35.3276	27.6	2.988			1899-12-31 11:52:00	HM3b		51.432	45.4712	9.21036
			1899-12-31 10:56:00	HK1b		56.4593	27.24	1.536			1899-12-31 12:02:00	HM4b		36.126	40.3274	9.47538
			1899-12-31 11:03:00	HK 3a		20.1778	27.54	1.26			1899-12-31 12:07:00	HM4a		35.244	34.9008	10.8134
			1899-12-31 11:08:00	HK 3b		12.8029	33.6	1.302			1899-12-31 12:12:00	HM5a	1899-12-31 12:12:00	29.652	25.3262	13.3995
			1899-12-31 11:08:00	HK 3b		12.8029	27.36	1.314			1899-12-31 12:13:00	HM5b		22.044	19.238	14.1595
			1899-12-31 11:20:00	HK1a		65.7774	26.76	1.296			1899-12-31 12:25:00	HM1a		3.561	23.3881	21.2756
			1899-12-31 11:30:00	HK 2a		25.0894	27.06	0.696			1899-12-31 12:30:00	HM1b		5.6856	29.3957	26.9672
			1899-12-31 11:35:00	HK 2b		17.4716	29.16	0.708			1899-12-31 12:36:00	HM3a		55.992	33.6276	27.185
			1899-12-31 11:58:00	HK1b		14.2046	24.9	1.416			1899-12-31 12:42:00	HM3b		59.694	42.7789	21.6769
			1899-12-31 12:08:00	HK 3a		23.3119	27.72	2.412			1899-12-31 13:03:00	HM4a		43.206	50.9375	6.79146
			1899-12-31 12:15:00	HK 3b		44.2894	33.24	3.948			1899-12-31 13:09:00	HM4b		49.32	45.8108	10.6185
			1899-12-31 12:21:00	HK1a		39.2576	38.46	3.774			1899-12-31 13:15:00	HM5a		46.482	40.6517	8.17212
			1899-12-31 12:36:00	HK 2a		45.1736	46.62	2.592			1899-12-31 13:23:00	HM5b		30.36	35.848	12.3082
			1899-12-31 12:42:00	HK 2b		40.4016	46.62	2.106			1899-12-31 13:28:00	HM1a		33.9	38.0251	15.7639
			1899-12-31 12:59:00	HK1b		63.8736	42.42	1.896			1899-12-31 13:33:00	HM1b		19.188	42.2645	20.6873
			1899-12-31 13:07:00	HK 3a		44.4389	36.42	1.668			1899-12-31 13:39:00	HM4a		60.18	42.3471	20.6286
			1899-12-31 13:13:00	HK 3b		18.2868	42.96	1.29			1899-12-31 13:44:00	HM5a		67.68	44.9857	20.1149
			1899-12-31 13:22:00	HK1a		15.211	41.28	1.35			1899-12-31 14:10:00	HM5b		30.774	47.2849	16.8153
			1899-12-31 13:31:00	HK 2a		73.0206	38.16	1.176			1899-12-31 14:27:00	HM1a		47.088	47.4027	16.9301
			1899-12-31 13:36:00	HK 2b		55.3562	43.08	1.41			1899-12-31 14:33:00	HM1b		30.684	45.6321	14.5796
			1899-12-31 13:58:00	HK1b		28.8092	45.06	2.85			1899-12-31 14:39:00	HM6a	1899-12-31 14:39:00	60.78	40.2544	23.5998
			1899-12-31 14:04:00	HK 3a		0	37.92	3.45			1899-12-31 14:45:00	HM6b	1899-12-31 14:45:00	58.824	31.8682	27.6634
			1899-12-31 14:10:00	HK 3b		22.9859	28.86	3.078			1899-12-31 14:51:00	HM5a		3.8832	35.9117	28.8969
			1899-12-31 14:21:00	HK1a		44.5322	29.16	2.022			1899-12-31 14:56:00	HM5b		5.16	32.318	26.0014
			1899-12-31 14:36:00	HK 2a		19.0729	33.54	1.722			1899-12-31 15:30:00	HM1a		50.898	33.2524	27.2461
			1899-12-31 14:42:00	HK 2b		30.1574	37.86	1.446			1899-12-31 15:35:00	HM1b		42.822	44.8535	23.738
			1899-12-31 14:57:00	HK1b		50.8222	34.38	1.146			1899-12-31 15:42:00	HM6a		63.48	48.8555	15.6983
			1899-12-31 15:02:00	HK 3a		44.8508	35.4	1.374			1899-12-31 15:48:00	HM6b		61.86	41.1181	22.4993
			1899-12-31 15:08:00	HK 3b		26.9671	39.6	2.178			1899-12-31 15:54:00	HM1a		25.17	44.6759	24.1802
			1899-12-31 15:34:00	HK 2a		24.1438	41.82	2.226			1899-12-31 15:59:00	HM1b		12.216	45.1787	24.69
			1899-12-31 15:40:00	HK 2b		51.1007	46.08	3.174			1899-12-31 16:42:00	HM6a		60.6	37.7612	23.9755
			1899-12-31 15:53:00	HK1a		61.8954	47.46	3.012			1899-12-31 16:48:00	HM6b		66	37.9355	23.864
			1899-12-31 16:00:00	HK 3a		66.3516	57.66	2.268			1899-12-31 16:55:00	HM7a	1899-12-31 16:55:00	24.804	36.7322	25.5756
			1899-12-31 16:07:00	HK 3b		33.8116	55.38	2.316			1899-12-31 17:00:00	HM1a	1899-12-31 17:00:00	26.04	25.2499	25.0561
			1899-12-31 16:32:00	HK 2a		75.012	52.98	2.16			1899-12-31 17:21:00	HM1b		6.198	27.459	29.6194
			1899-12-31 16:38:00	HK 2b		39.7521	45.72	1.734			1899-12-31 17:26:00	HM6a		3.2016	28.1234	34.1585
			1899-12-31 17:00:00	HK1b		49.9202	49.26	1.566			1899-12-31 17:39:00	HM6b		77.04	38.6463	35.4753
			1899-12-31 17:32:00	HK 2a		30.1938	48.42	1.416			1899-12-31 17:45:00	HM7a		73.56	44.2514	30.9979
			1899-12-31 17:39:00	HK 2b		51.4259	54.18	1.074			1899-12-31 17:54:00	HM1a		33.204	46.4151	27.6086
			1899-12-31 17:54:00	HK1a		70.9062	50.7	1.2			1899-12-31 17:59:00	HM1b		34.224	33.1186	25.0549
			1899-12-31 19:00:00	HK1b		68.5872	52.56	1.752			1899-12-31 18:20:00	HM7a		14.022	28.9474	17.1136
			1899-12-31 19:04:00	HK 3a		32.4889	54.9	2.946			1899-12-31 18:25:00	HM1a		10.572	27.883	19.5691
			1899-12-31 19:09:00	HK 3b		39.31	45.24	2.904			1899-12-31 18:38:00	HM1b		52.716	31.5958	23.2646
			1899-12-31 19:23:00	HK1a		63.2442	38.76	2.64			1899-12-31 18:44:00	HM7a		60.54	31.9424	22.948
			1899-12-31 19:27:00	HK 2a		22.7158	46.32	1.458			1899-12-31 19:19:00	HM1a		20.148	39.7073	20.3277
			1899-12-31 19:32:00	HK 2b		35.8978	44.58	1.608			1899-12-31 19:24:00	HM1b		15.756	33.4531	20.1337
			1899-12-31 20:00:00	HK1b		70.479	40.92	1.488			1899-12-31 19:54:00	HM8b	1899-12-31 19:54:00	49.398	22.7058	15.9862
			1899-12-31 20:05:00	HK 3a		30.683	38.4	1.38			1899-12-31 20:00:00	HM7b		21.444	19.2752	18.3399
			1899-12-31 20:10:00	HK 3b		44.8174	40.26	1.434			1899-12-31 22:06:00	HM7b		6.786	16.7477	19.7624
			1899-12-31 20:21:00	HK1a		10.0706	36.54	1.206			1899-12-31 22:16:00	HM7b		2.994	9.468	7.83108
			1899-12-31 20:33:00	HK 2a		45.1541	33.06	1.578			1899-12-31 22:25:00	HM7b		3.1152	6.46986	4.68556
			1899-12-31 20:39:00	HK 2b		51.8493	36.72	2.688			1899-12-31 22:31:00	HM8a	1899-12-31 22:31:00	12.984	8.04942	6.97782
			1899-12-31 21:00:00	HK1b		13.5549	41.94	2.838
			1899-12-31 21:04:00	HK 3a		62.9346	48.24	2.31
			1899-12-31 21:09:00	HK 3b		36.2697	45.66	1.776
			1899-12-31 21:18:00	HK1a		76.491	49.14	1.092
			1899-12-31 21:37:00	HK 2a		39.0535	52.38	2.928
			1899-12-31 21:39:00	HK 2b		30.8273	48.36	4.458
			1899-12-31 21:52:00	HK1b		79.1412	35.52	5.508
			1899-12-31 22:03:00	HK 3a		16.3555	29.76	6.42
			1899-12-31 22:08:00	HK 3b		12.1388	23.88	5.502
			1899-12-31 22:34:00	HK 2a		10.4186	10.02	4.824
			1899-12-31 22:40:00	HK 2b		1.19669	7.92	3.936
Figure 5 data
adaptation irradiance		Strain Number
50		91
150		91
200		91
rate=	fmoll N2 heterocyst-1 h-1
95% CI= 95% confidence interval
Irradiance	50	95% CI	150	200	95% CI
	rate			rate
15	44.6372	7.99		28.9124	6.30042
30	50.8047	7.52		44.7829	10.4578
50	58.0583	6.8		50.3623	10.3923
75	81.5477	7.06		71.938	12.7272
100	103.474	9.51		92.3418	11.7942
150	85.933	8.36		133.868	19.9225
200	82.0051	8.29		135.657	15.9831
300	82.344	6.94		140.382	20.9144
400	80.2318	7.65		135.011	19.0482
500	88.3732	4.74		147.914	20.8744
			rate
50			37.6
75			60.6
100			89.5
150			116
200
250
300			132
350			136
400			160
600			166
Figure 6 data		concentrations in micromole per liter
Strain #83 used
N-source Tested	Date	Day into Exp.	No added N	N	PO4	SiO2	+40 µM NO|-3|+-	NH4+	PO4	SiO2	+ 10 µM NH4+	PO4	SiO2		N-source Tested	Day into Exp.	Avg. Cell/mL	Log Cell	Richelia ml-1	Log Sym.	asymbiotic hosts	symb/cell	% symbiotic hosts	Avg. Cell/mL	Log Cell	Avg. Sym (sym/mL)	Log Sym.	TOT No Sym 2 (cell/mL)	symb/cell	% symbiotic hosts	Avg. Cell/mL	Log Cell	Avg. Sym (sym/mL)	Log Sym.	TOT No Sym 2 (cell/mL)	symb/cell	% symbiotic hosts
No N-source	2011-04-26	0	0.13	0.04	3.18	29.51									No N-source	0	161	2.20683	217	2.33646	35	1.74297	78.2609
No N-source	2011-04-27	1	0	0.04	3.44	34.06									No N-source	1	218.5	2.33945	266.5	2.4257	52	1.61515	76.2014
No N-source	2011-04-29	3	0.03	0.05	3.42	33.94									No N-source	3	263	2.41996	293	2.46687	18	1.40865	93.1559
No N-source	2011-05-02	6	0.07	0.07	2.87	32.23									No N-source	6	418	2.62118	538	2.73078	66	1.56395	84.2105
No N-source	2011-05-04	8	0	0.05	3.07	32.52									No N-source	8	836	2.92221	1066	3.02776	116	1.47441	86.1244
No N-source	2011-05-06	10	0.03	0.11	3.13	29.86									No N-source	10	776	2.88986	1008	3.00346	116	1.55556	85.0515
No N-source	2011-05-09	13	0	0.05	2.87	24.71									No N-source	13	1260	3.10037	1443	3.15927	232	1.40097	81.5873
No N-source	2011-05-11	15	0	0.07	2.4	18.22									No N-source	15	1268.73	3.10337	1272.06	3.10451	296.37	1.35461	76.6404
No N-source	2011-05-13	17	0	0.07	2.52	17.48									No N-source	17	1640.03	3.21485	1361.97	3.13417	486.18	1.13611	70.3553
No N-source	2011-05-16	20	0	0.08	2.2	12.96									No N-source	20	1830	3.26245	1370	3.13672	590	1.13693	67.7596
Species	H. hauckii														Species
N-source Tested	Date	Day into Exp.													N-source Tested	Day into Exp.
Nitrate	2011-04-26	0					42.33	0.06	3.29	31.11					Nitrate	0								114	2.0569	139.5	2.14457	27	1.61272	76.3158
Nitrate	2011-04-27	1					44.94	0.03	3.65	33.61					Nitrate	1								189	2.27646	238	2.37658	42	1.67606	77.7778
Nitrate	2011-04-29	3					41.1	0.03	3.16	33.66					Nitrate	3								208	2.31806	256	2.40824	48	1.57055	76.9231
Nitrate	2011-05-02	6					39.01	0.05	3.18	29.19					Nitrate	6								354	2.549	503	2.70157	48	1.64379	86.4407
Nitrate	2011-05-04	8					44.9	0.04	3.15	32.21					Nitrate	8								800	2.90309	1123	3.05038	78	1.57063	90.25
Nitrate	2011-05-06	10					46	0.03	2.74	27.05					Nitrate	10								804	2.90526	1101	3.04179	82	1.55728	89.801
Nitrate	2011-05-09	13					45.99	0.05	2.6	21.43					Nitrate	13								1853.02	3.26788	2381.39	3.37683	203.13	1.45344	89.0379
Nitrate	2011-05-11	15					44.04	0.07	1.99	14.95					Nitrate	15								2192.8	3.341	2286.05	3.35908	379.62	1.27959	82.6879
Nitrate	2011-05-13	17					43.85	0.08	2.07	11.25					Nitrate	17								1671.66	3.22315	1431.9	3.15591	432.9	1.18621	74.1036
Nitrate	2011-05-16	20					44.15	0.1	1.88	8.93					Nitrate	20								1500	3.17609	1140	3.0569	630	1.20635	58
Nitrate															Nitrate
Species	H. hauckii														Species
N-source Tested	Date	Day into Exp.													N-source Tested	Day into Exp.
Ammonium	2011-04-26	0									10.6314	3.4	32.8		Ammonium	0															90	1.95424	106	2.02531	22	1.82759	75.5556
Ammonium	2011-04-27	1									10.5264	3.23	34.97		Ammonium	1															166.5	2.22141	233.5	2.36829	20	1.71691	87.988
Ammonium	2011-04-29	3									8.43643	3.04	33.5		Ammonium	3															283	2.45179	297.5	2.47349	94	1.59517	66.7845
Ammonium	2011-05-02	6									6.76643	2.57	32.18		Ammonium	6															652	2.81425	677	2.83059	194	1.45905	70.2454
Ammonium	2011-05-04	8									4.90643	3.05	33.31		Ammonium	8															874	2.94151	964	2.98408	176	1.41973	79.8627
Ammonium	2011-05-06	10									2.89143	2.82	26.9		Ammonium	10															1311.5	3.36474	2221	3.34655	1100	1.43383	71.9019
Ammonium	2011-05-09	13									1.40143	2.48	18.84		Ammonium	13															2084.58	3.31902	1661.67	3.22054	839.16	1.29779	59.7444
Ammonium	2011-05-11	15									0.89643	2.2	14.64		Ammonium	15															1625.04	3.21086	1050.62	3.02144	792.54	1.24213	51.2295
Ammonium	2011-05-13	17									0.99643	2.06	14.37		Ammonium	17															1868.13	3.27141	1135.53	3.0552	852.48	1.18403	54.3672
Ammonium	2011-05-16	20									0.82643	2	10.84		Ammonium	20															2070	3.31597	1305	3.11561	1010	1.22535	51.2077
