# Supplementary material for: Isolation, growth, and nitrogen fixation rates of the Hemiaulus-Richelia (diatom-cyanobacterium) symbiosis in culture
Source: PeerJ. 2020 Oct 8;8:e10115. doi: 10.7717/peerj.10115 (PMC7548074; doi:10.7717/peerj.10115)
Supplement: Supplemental Information 2 [file peerj-08-10115-s002.xls]

## Sheet: Sheet1
Table S2. Preliminary data on nitrate consumption by the Hemiaulus hauckii symbiosis.
Temperature = 20°C
Photoperiod= 14:L10 LD
Strain 22
Initial cell counts in the three flasks were ~200 cells per ml (original data lost)
Final cell counts on day 6 was ~2,000 cells per ml (original data lost).
Experimental Flasks	Day		Nitrate Nit		Phosphate		Silicate		Ammonia*
			µM		µM		µM		µM
Flask 1
7/30 1.1	0		38.711		13.255		13.582		0.055
7/30 1.2	0		32.85		10.735		11.603		0.044
8/2 1.1	3		37.19		12.158		21.51		-0.037
8/2 1.2	3		35.381		11.475		20.097		-0.038
8/3 1.1	4		40.322		13.317		24.211		-0.036
8/3 1.2	4		37.26		12.149		22.05		-0.036
8/4 1.1	5		33.273		10.502		18.503		-0.038
8/4 1.2	5		35.237		11.104		19.674		-0.037
8/5 1.1	6		36.512		11.834		18.138		-0.037
8/5 1.2	6		39.029		12.742		19.681		-0.034
Flask 2
7/30 2.1	0		36.727		12.103		11.623		0.06
7/30 2.2	0		33.599		11.178		10.549		0.05
8/2 2.1	3		32.291		12.449		16.849		-0.036
8/2 2.2	3		33.387		11.5		16.791		-0.038
8/3 2.1	4		37.539		12.678		18.483		-0.037
8/3 2.2	4		34.012		10.959		15.867		-0.038
8/4 2.1	5		36.403		12.107		17.442		-0.034
8/4 2.2	5		35.881		11.74		16.361		-0.035
8/5 2.1	6		33.802		11.255		13.901		-0.039
8/5 2.2	6		36.437		12.018		15.255		-0.037
Flask 3
7/30 3.1	0		39.796		13.898		13.12		0.085
7/30 3.2	0		37.223		12.505		11.779		0.077
8/2 3.1	3		34.975		11.841		23.71		-0.037
8/2 3.2	3		38.778		12.732		25.975		-0.037
8/3 3.1	4		40.887		13.45		28.741		-0.038
8/3 3.2	4		35.381		11.279		23.794		-0.039
8/4 3.1	5		39.873		12.748		28.454		-0.038
8/4 3.2	5		40.117		12.865		28.884		-0.039
8/5 3.1	6		38.586		14.179		30.446		-0.036
8/5 3.2	6		30.781		10.189		21.666		-0.038
*negative values indicate the cultures reduced the ammonium concentration to values below the carrier medium in the nutrient analyzer.
The values are below the detection limit of the instrument.
